# Supplementary material for: Regulatory Emotional Self-Efficacy Buffers the Effect of Heart Rate Variability on Functional Capacity in Older Adults With Chronic Low Back Pain
Source: Frontiers journal article supplement (doi:10.3389/fpain.2022.818408), 2022-05-20
Supplement: Table_1.pdf [file Table_1.pdf]

**Supplementary Table 1. *Descriptives of Physiological Measurements***

| <b>Parameter</b>                     | <b>M</b> | <b>SD</b> |
|--------------------------------------|----------|-----------|
| Systolic Blood Pressure (mmHg)       | 127.3    | 15.0      |
| Diastolic Blood Pressure (mmHg)      | 71.3     | 8.7       |
| HR (bpm) <sup>a</sup>                | 63.9     | 9.2       |
| Total Power (ms <sup>2</sup> )       | 898.1    | 2006.9    |
| Very Low Frequency(ms <sup>2</sup> ) | 269.7    | 565.1     |
| HF <sub>n</sub> (n.u.) <sup>b</sup>  | 41.9     | 22.5      |
| LF <sub>n</sub> (n.u.) <sup>c</sup>  | 58.1     | 22.5      |
| LF/HF Ratio (ms <sup>2</sup> )       | 2.9      | 4.1       |
| SDNN (ms) <sup>d</sup>               | 47.3     | 39.7      |
| RMSSD (ms) <sup>e</sup>              | 41.6     | 58.7      |

a= Heart rate; b=High frequency power in relation to total power; c=Low frequency power in relation to total power

d=Standard deviation of consecutive RR intervals; e=Root mean square of the consecutive RR differences
